# Supplementary material
Source: PubMed Central journal article supplement (PMC7709734)
Supplement: NIHMS1580686-supplement-1.pdf [file NIHMS1580686-supplement-1.pdf]

| n = 12                        | Baseline     |             | CPR 6.5'     |              | CPR 11.5'    |              | CPR 16.5'    |              | ROSC 15'    |             |
|-------------------------------|--------------|-------------|--------------|--------------|--------------|--------------|--------------|--------------|-------------|-------------|
|                               | 20, 30, 40   | 40, 30, 20  | 20, 30, 40   | 40, 30, 20   | 20, 30, 40   | 40, 30, 20   | 20, 30, 40   | 40, 30, 20   | 20, 30, 40  | 40, 30, 20  |
| pH                            | 7.45 ± 0.01  | 7.46 ± 0.04 | 7.19 ± 0.05  | 7.23 ± 0.02  | 7.16 ± 0.05  | 7.20 ± 0.03  | 7.10 ± 0.05  | 7.17 ± 0.03  | 7.17 ± 0.05 | 7.24 ± 0.04 |
| PaCO <sub>2</sub>             | 44.7 ± 3.8   | 44.5 ± 5.9  | 62.7 ± 7.6   | 58.3 ± 4.7   | 64.0 ± 10.7  | 56.5 ± 7.5   | 71.5 ± 10.2  | 59.0 ± 6.0   | 56.8 ± 7.6  | 47.3 ± 6.5  |
| PaO <sub>2</sub>              | 121.5 ± 48.6 | 83.2 ± 7.4  | 119.5 ± 43.7 | 136.2 ± 62.0 | 119.8 ± 49.3 | 130.2 ± 62.4 | 106.8 ± 92.2 | 134.5 ± 70.7 | 89.3 ± 20.6 | 96.0 ± 7.6  |
| HCO <sub>3</sub> <sup>-</sup> | 30.7 ± 2.5   | 31.2 ± 2.8  | 23.8 ± 0.9   | 24.5 ± 2.3   | 22.4 ± 1.7   | 22.1 ± 2.8   | 22.0 ± 2.0   | 21.7 ± 2.2   | 20.3 ± 1.3  | 20.0 ± 2.3  |
| BE                            | 6.6 ± 2.5    | 7.3 ± 2.9   | -4.4 ± 0.9   | -3.1 ± 2.5   | -6.3 ± 1.1   | -6.0 ± 2.9   | -7.5 ± 1.7   | -6.8 ± 2.4   | -8.3 ± 1.3  | -7.5 ± 2.6  |
| SaO <sub>2</sub>              | 98.0 ± 1.3   | 95.0 ± 2.8  | 94.8 ± 5.0   | 96.0 ± 3.9   | 92.0 ± 9.8   | 95.5 ± 4.3   | 82.7 ± 12.0  | 95.0 ± 5.1   | 91.7 ± 6.9  | 95.8 ± 1.5  |

Supplementary Table. Arterial blood gas values for Study B, comparing two elevation of the head and thorax sequences during active compression-decompression cardiopulmonary resuscitation with an impedance threshold device. All values are presented as mean ± SD.
